# Supplementary material
Source: MDPI journal article supplement (https://www.mdpi.com/2312-7481/9/2/50)
Supplement: s1 [file s1 › magnetochemistry-2155548-supplementary.pdf]

## **Supporting Information**

# Transition-layer implantation for improving magnetoelectric response in cofired laminated composite

**Sheng Liu <sup>1</sup>, Sihua Liao <sup>1</sup>, Hongxiang Zou <sup>1</sup>, Bo Qin <sup>1,\*</sup> and Lianwen Deng <sup>2</sup>**

*1 College of Mechanical Engineering, Hunan Institute of Engineering, Xiangtan, 411104, China*

*2 School of Physics and Electronics, Central South University, Changsha, 410083, China*

*\* Correspondence: qinbo@hnie.edu.cn ; Tel. +86 13973255304:*

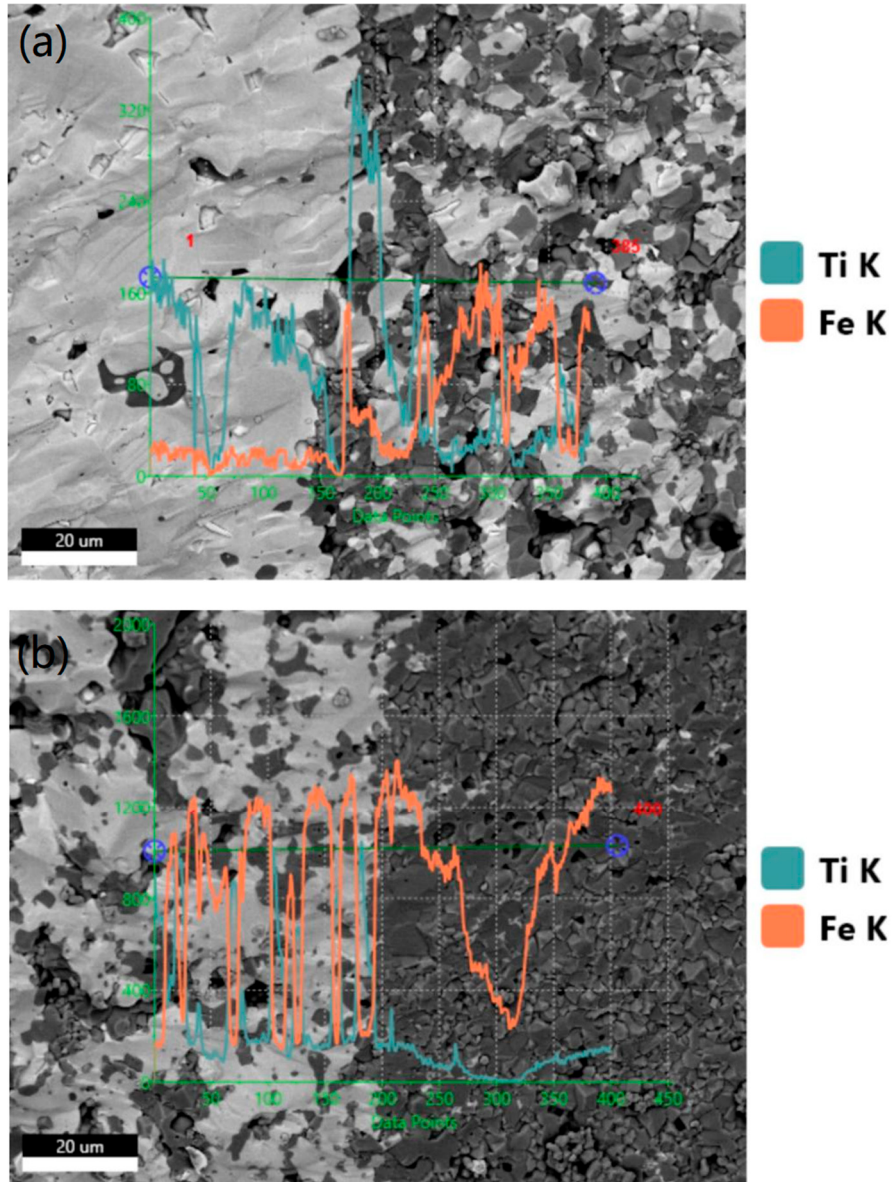

Figure S1. Element distribution in laminated sample adjacent to the interface and away from the interface.
